# Supplementary material for: Sequential Therapy with Docetaxel and Cabazitaxel Starting at Low PSA Levels was Associated with Longer Survival in Patients with Castration-Resistant Prostate Cancer
Source: Research Square preprint supplement (doi:10.21203/rs.3.rs-562897/v1), 2021-06-21
Supplement: Supplementary file 1 [file 4bd04628e68de380eeaff1cc.xlsx]

## Sheet: Table 1
Table 1. Patient characteristics at the start of treatment (n=146)
Factors		DOC	CBZ
Median (IQR) age (y)		70(66-76)	71(67-76)
PS	0	85(58%)	64(44%)
	1 or higher	59(41%)	76(52%)
GS	8 or less	41(28%)
	9 or more	99(68%)
Previous ARAT+		101(69%)
Median (IQR) PSA (ng/mL)		22(6-63)	42(13-146)
Median (IQR) Hb (g/dl )		12.7(11.5-13.6)	11.4(10.3-12.5)
Median (IQR) LDH (U/L)		209(177-271)	233(196-309
Median (IQR) ALP (U/L)		280(213-449)	270(200-413)
Metastasis	No	6(4%)	4(3%)
	Lymph node only	20(14%)	13(9%)
	Bone less than 4	17(12%)	15(10%)
	Bone 4 or higher	72(49%)	66(45%)
	Visceral	27(19%)	39(27%)
DOC: docetaxel,CBZ: cabazitaxel, IQR: interquartile range, PS: performance status, GS: Gleason score,
ARAT: androgen receptor axis–targeting reagent, LDH: lactate dehydrogenase, ALP: alkaline phosphatase

## Sheet: Table 2
Table 2. Univariate Cox proportional hazard analyzes for PFS of patients with DOC and CBZ treatment
	DOC		CBZ
	Hazard ratio (95% CI)	P	Hazard ratio (95% CI)	P
Age >70y	1.06 (0.76-1.48)	0.736	1.11 (0.78-1.57)	0.579
PS>=1	1.07 (0.76-1.51)	0.687	1.39 (0.97-1.99)	0.072
GS 9 or more	0.95(0.67-1.36)	0.78	0.93 (0.64-1.35)	0.692
Previous ARAT	1.25 (0.87-1.80)	0.223	1.44 (0.98-2.13)	0.063
PSA >20ng/ml or 40ng/ml	1.16 (0.83-1.62)	0.377	1.14 (0.80-1.62)	0.474
Hb <13g/dl	1.04 (0.74-1.47)	0.818	1.20 (0.83-1.74)	0.331
LDH >220U/L	1.24 (0.88-1.74)	0.216	1.69 (1.18-2.43)	0.004*
ALP >280U/L	1.05 (0.75-1.48)	0.76	1.09 (0.76-1.55)	0.647
Bone meta >=4 or visceral meta+	1.46 (1.02-2.10)	0.041*	1.16 (0.77-1.75)	0.489
DOC: docetaxel, CBZ: cabazitaxel, PS: performance status, GS: Gleason score, ARAT: androgen receptor axis–targeting reagent, *p<0.05
PSA: prostate-specific antigen, LDH: lactate dehydrogenase, ALP: alkaline phosphatase

## Sheet: Table 3
Table 3. Cox proportional hazard analyzes for combined PFS of DOC-CBZ treatment
	Univariate		Multivariate
	Hazard ratio (95% CI)	P	Hazard ratio (95% CI)	P
Age >70y	1.29 (0.90-1.83)	0.16	1.25 (0.85-1.83)	0.258
PS>=1	1.25 (0.87-1.81)	0.235	1.02 (0.67-1.56)	0.923
GS 9 or more	0.889 (0.61-1.29)	0.539	0.86 (0.58-1.29)	0.464
Previous ARAT	1.44 (0.98-2.12)	0.065	1.53 (0.96-2.45)	0.076
PSA >20ng/ml	1.69 (1.17-2.42)	0.005*	1.81 (1.20-2.72)	0.004*
Hb <13g/dl	1.38 (0.96-2.00)	0.084	1.42 (0.94-2.15)	0.098
LDH >220U/L	1.37 (0.95-1.97)	0.094	1.48 (1.00-2.19)	0.052
ALP >280U/L	1.06 (0.74-1.51)	0.77	0.97 (0.64-1.46)	0.885
Bone meta >=4 or visceral meta+	1.43 (0.98-2.08)	0.065	1.27 (0.83-1.95)	0.268
DOC: docetaxel, CBZ: cabazitaxel, PS: performance status, GS: Gleason score, ARAT: androgen receptor axis–targeting reagent
PSA: prostate-specific antigen, LDH: lactate dehydrogenase, ALP: alkaline phosphatase, *P<0.05

## Sheet: Table 4
Table 4. Cox proportional hazard analyzes for OS from the initiation of DOC
	Univariate		Multivariate
	Hazard ratio (95% CI)	P	Hazard ratio (95% CI)	P
Age >70y	1.27 (0.81-1.98)	0.292	1.47 (0.90-2.41)	0.127
PS>=1	1.65 (1.04-2.61)	0.032	1.50 (0.90-2.51)	0.122
GS 9 or more	1.04 (0.65-1.68)	0.865	1.03 (0.62-1.71)	0.91
Previous ARAT	0.93 (0.58-1.49)	0.762	1.10 (0.62-1.95)	0.745
PSA >20ng/ml	2.05 (1.28-3.29)	0.002*	2.55 (1.45-4.48)	0.001*
Hb <13g/dl	2.45 (1.47-4.08)	<0.001*	2.22 (1.29-3.82)	0.004*
LDH >220U/L	1.49 (0.94-2.35)	0.092	1.68 (1.01-2.81)	0.046*
ALP >280U/L	1.59 (1.00-2.53)	0.049*	1.24 (0.74-2.08)	0.408
Bone meta >=4 or visceral meta+	1.51 (0.93-2.43)	0.096	1.48 (0.85-2.59)	0.169
OS: overall survival, DOC: docetaxel, PS: performance status, GS: Gleason score, ARAT: androgen receptor axis–targeting reagent
PSA: prostate-specific antigen, LDH: lactate dehydrogenase, ALP: alkaline phosphatase, *P<0.05
